# Supplementary material for: The impact of assortative mating, participation bias, and socioeconomic status on the polygenic risk of behavioral and psychiatric traits
Source: medRxiv preprint, doi:10.1101/2022.11.29.22282912, version 1 (2022-11-30)
Supplement: Supplemental Methods and Figures [file 282912_file02.docx]

**Supplementary Methods and Results**

*Heritability estimation*

We used the Linkage Disequilibrium Score Regression method (LDSC) to estimate the single nucleotide polymorphisms based heritability (SNP-h2) of each MHQ trait1. For this, the genome-wide association study (GWAS) summary statistics of each MHQ trait were formatted as standard LDSC input and analyzed using the 1000 Genomes phase 3 European dataset as LD reference panel2. The major histocompatibility complex (MHC) region (chr6: 26–34Mb) was excluded from the analysis. Also, heritability estimates of MHQ traits using the Scalable and Accurate Implementation of GEneralized (SAIGE)3 mixed model were obtained from the pan-ancestry genetic analysis of the UKB (Pan-UKB) website (<https://pan.ukbb.broadinstitute.org>)4. Those MHQ traits with a SNP-h2 p-value < 0.05 and a SAIGE heritability estimate > 0.03 were selected for the estimation of AM.

*Genome-wide association analysis of socioeconomic status-related variables*

We performed GWAS for two measures of socioeconomic status (SES): household income (HI) and the Townsend deprivation index (TDI) separately in 118,656 unrelated UKB participants of European descent who completed the MHQ (MHQ-responders). HI refers to the combined gross income of all members of a household and was assessed via a touchscreen questionnaire completed by UKB participants5. This information was collected using a 5-point scale corresponding to the total household income before tax, 1 being less than £18,000, 2 being £18,000–£29,999, 3 being £30,000–£51,999, 4 being £52,000–£100,000 and 5 being greater than £100,0006. TDI is a measure of material deprivation based on four variables: unemployment, non-car ownership, non-home ownership, and household overcrowding aggregated for postcodes of residence7,8.

GWAS were performed using a logistic regression implemented in PLINK 1.99, including age, sex and the top ten PC to adjust by population stratification. Analyses include only SNPs with the following criteria: minor allele frequencies ≥ 0.01, missingness <0.05, HWE p values >1 × 10−6, and imputation quality score >0.3. LD pruning algorithm implemented in PLINK (r2<0.5 considering a window of 50 SNPs). PCs were calculated using the fast PCA approach implemented in PLINK version 2.010,11. LD score regression intercepts for the results of both GWAS were estimated to distinguish polygenic heritability from inflation.

**References**

1. Schizophrenia Working Group of the Psychiatric Genomics Consortium, Bulik-Sullivan, B. K., Loh, P.-R., Finucane, H. K., Ripke, S., Yang, J., Patterson, N., Daly, M. J., Price, A. L., & Neale, B. M. (2015). LD Score regression distinguishes confounding from polygenicity in genome-wide association studies. Nature Genetics, 47(3), 291–295. <https://doi.org/10.1038/ng.3211>
2. 1000 Genomes Project Consortium, Auton, A., Brooks, L. D., Durbin, R. M., Garrison, E. P., Kang, H. M., Korbel, J. O., Marchini, J. L., McCarthy, S., McVean, G. A., & Abecasis, G. R. (2015). A global reference for human genetic variation. *Nature*, *526*(7571), 68–74.<https://doi.org/10.1038/nature15393>
3. Zhou, W., Nielsen, J. B., Fritsche, L. G., Dey, R., Gabrielsen, M. E., Wolford, B. N., LeFaive, J., VandeHaar, P., Gagliano, S. A., Gifford, A., Bastarache, L. A., Wei, W.-Q., Denny, J. C., Lin, M., Hveem, K., Kang, H. M., Abecasis, G. R., Willer, C. J., & Lee, S. (2018). Efficiently controlling for case-control imbalance and sample relatedness in large-scale genetic association studies. *Nature Genetics*, *50*(9), 1335–1341.<https://doi.org/10.1038/s41588-018-0184-y>
4. Pan-UKB team. https://pan.ukbb.broadinstitute.org. 2020.
5. Bycroft, C., Freeman, C., Petkova, D., Band, G., Elliott, L. T., Sharp, K., Motyer, A., Vukcevic, D., Delaneau, O., O’Connell, J., Cortes, A., Welsh, S., Young, A., Effingham, M., McVean, G., Leslie, S., Allen, N., Donnelly, P., & Marchini, J. (2018). The UK Biobank resource with deep phenotyping and genomic data. *Nature*, *562*(7726), 203–209. <https://doi.org/10.1038/s41586-018-0579-z>
6. Hill, W. D., Davies, N. M., Ritchie, S. J., Skene, N. G., Bryois, J., Bell, S., Di Angelantonio, E., Roberts, D. J., Xueyi, S., Davies, G., Liewald, D. C. M., Porteous, D. J., Hayward, C., Butterworth, A. S., McIntosh, A. M., Gale, C. R., & Deary, I. J. (2019). Genome-wide analysis identifies molecular systems and 149 genetic loci associated with income. *Nature Communications*, *10*(1), 5741. <https://doi.org/10.1038/s41467-019-13585-5>
7. Townsend, P., Phillimore, P., & Beattie, A. (1988). *Health and deprivation: Inequality and the North*. Croom Helm.
8. Foster, H. M. E., Celis-Morales, C. A., Nicholl, B. I., Petermann-Rocha, F., Pell, J. P., Gill, J. M. R., O’Donnell, C. A., & Mair, F. S. (2018). The effect of socioeconomic deprivation on the association between an extended measurement of unhealthy lifestyle factors and health outcomes: A prospective analysis of the UK Biobank cohort. *The Lancet Public Health*, *3*(12), e576–e585. <https://doi.org/10.1016/S2468-2667(18)30200-7>
9. Chang, C. C., Chow, C. C., Tellier, L. C., Vattikuti, S., Purcell, S. M., & Lee, J. J. (2015). Second-generation PLINK: Rising to the challenge of larger and richer datasets. *GigaScience*, *4*(1), 7. <https://doi.org/10.1186/s13742-015-0047-8>
10. Galinsky, K. J., Bhatia, G., Loh, P.-R., Georgiev, S., Mukherjee, S., Patterson, N. J., & Price, A. L. (2016). Fast principal-component analysis reveals convergent evolution of adh1b in europe and east asia. *American Journal of Human Genetics*, *98*(3), 456–472.<https://doi.org/10.1016/j.ajhg.2015.12.022>
11. Purcell, S., Neale, B., Todd-Brown, K., Thomas, L., Ferreira, M. A. R., Bender, D., Maller, J., Sklar, P., de Bakker, P. I. W., Daly, M. J., & Sham, P. C. (2007). PLINK: A tool set for whole-genome association and population-based linkage analyses. *American Journal of Human Genetics*, *81*(3), 559–575.<https://doi.org/10.1086/519795>

**Supplementary Figures**


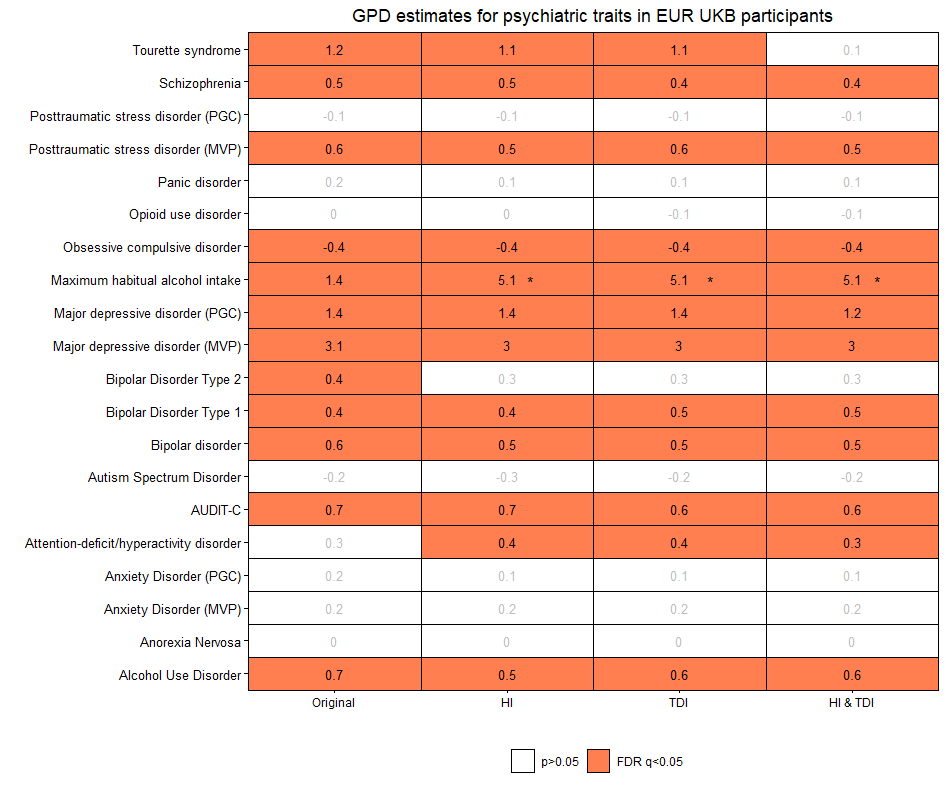


**Supplementary Figure 1.** Genetic signatures of assortative mating across psychiatric traits and disorders in UKB participants of European descent. Cell shades correspond to significance strength of each estimate, from white (p > 0.05, non-significant), to dark coral (FDR q < 0.05, FDR-significant). The estimate reported as a percentage is shown in the center of each cell. An asterisk in the cell indicates a significant difference of the SES-conditioned estimate with respect to the original estimate (difference-p<0.05). Abbreviations: Psychiatric Genomics Consortium (PGC); Million Veteran Program (MVP); Mental Health Questionary (MHQ); Household income (HI); Townsend Deprivation Index (TDI).


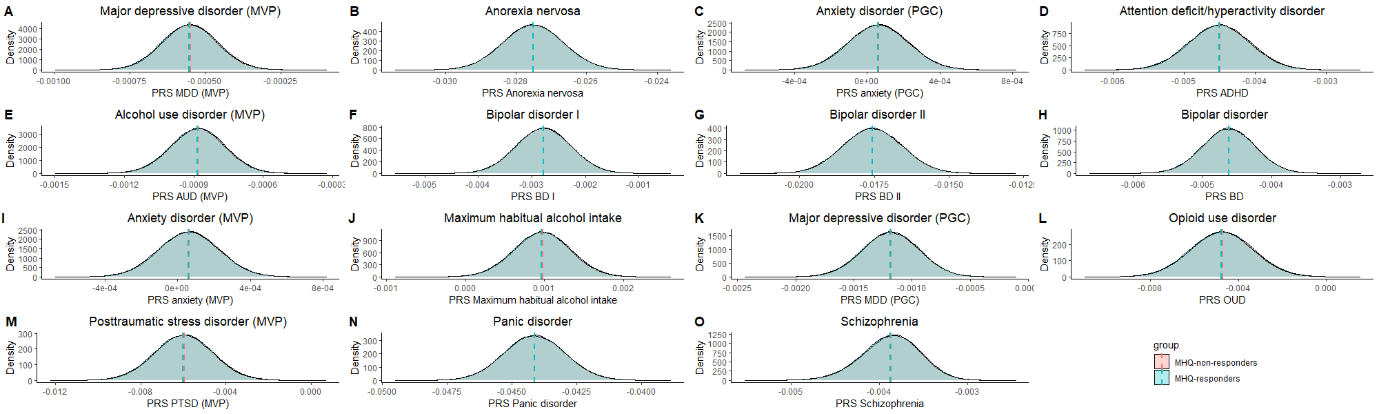


**Supplementary Figure 2.** Polygenic risk score (PRS) distributions in MHQ-responders (blue) and MHQ-non-responders (pink). Mean of PRS distributions is shown as a colored dashed line. Distributions from psychiatric traits with a significant difference (p<0.05) between both groups are shown. Abbreviations: Psychiatric Genomics Consortium (PGC); Million Veteran Program (MVP). Full results are shown in Supplementary Table 7.
